# Supplementary material
Source: publisher figshare collection journal article supplement (https://gsajournals.figshare.com/ndownloader/files/21989295)
Supplement: Supplementary file 1 [file 21989295]

## Sheet: Sheet1
Table S4
sample	population	Phenotypic Sex	Genetic Sex	Inversion Karyotype
CMANI92_0001	Aniak River	NA	F	++
CMANI92_0002	Aniak River	NA	F	++
CMANI92_0003	Aniak River	NA	M	++
CMANI92_0004	Aniak River	NA	M	++
CMANI92_0005	Aniak River	NA	F	++
CMANI92_0006	Aniak River	NA	F	++
CMANI92_0007	Aniak River	NA	F	++
CMANI92_0008	Aniak River	NA	F	+-
CMANI92_0009	Aniak River	NA	M	+-
CMANI92_0010	Aniak River	NA	M	++
CMANI92_0013	Aniak River	NA	M	++
CMANI92_0014	Aniak River	NA	F	++
CMANI92_0015	Aniak River	NA	M	+-
CMANI92_0016	Aniak River	NA	M	++
CMANI92_0017	Aniak River	NA	M	++
CMANI92_0018	Aniak River	NA	F	++
CMANI92_0019	Aniak River	NA	F	+-
CMANI92_0020	Aniak River	NA	M	+-
CMANI92_0021	Aniak River	NA	F	++
CMANI92_0022	Aniak River	NA	M	++
CMANI92_0025	Aniak River	NA	F	++
CMANI92_0026	Aniak River	NA	M	++
CMANI92_0027	Aniak River	NA	F	++
CMANI92_0028	Aniak River	NA	F	++
CMANI92_0029	Aniak River	NA	F	++
CMANI92_0030	Aniak River	NA	F	+-
CMANI92_0031	Aniak River	NA	M	++
CMANI92_0032	Aniak River	NA	M	++
CMANI92_0033	Aniak River	NA	M	++
CMANI92_0034	Aniak River	NA	M	++
CMANI92_0037	Aniak River	NA	F	++
CMANI92_0038	Aniak River	NA	F	+-
CMANI92_0039	Aniak River	NA	F	++
CMANI92_0040	Aniak River	NA	F	++
CMANI92_0041	Aniak River	NA	F	++
CMANI92_0042	Aniak River	NA	M	++
CMANI92_0043	Aniak River	NA	F	++
CMANI92_0044	Aniak River	NA	M	++
CMANI92_0045	Aniak River	NA	F	++
CMANI92_0046	Aniak River	NA	M	++
CMANI92_0049	Aniak River	NA	F	++
CMANI92_0050	Aniak River	NA	F	++
CMANI92_0051	Aniak River	NA	M	++
CMANI92_0052	Aniak River	NA	F	++
CMANI92_0053	Aniak River	NA	M	++
CMANI92_0054	Aniak River	NA	M	++
CMANI92_0055	Aniak River	NA	M	++
CMANI92_0056	Aniak River	NA	M	++
CMANI92_0058	Aniak River	NA	M	++
CMANI92_0061	Aniak River	NA	F	+-
CMANI92_0062	Aniak River	NA	F	++
CMANI92_0063	Aniak River	NA	M	++
CMANI92_0064	Aniak River	NA	M	++
CMANI92_0065	Aniak River	NA	M	++
CMANI92_0066	Aniak River	NA	M	+-
CMANI92_0067	Aniak River	NA	F	+-
CMANI92_0068	Aniak River	NA	M	++
CMANI92_0069	Aniak River	NA	M	++
CMANI92_0070	Aniak River	NA	F	++
CMANI92_0071qc	Aniak River	NA	F	++
CMANI92_0072qc	Aniak River	NA	F	++
CMANI92_0073	Aniak River	NA	M	++
CMANI92_0074	Aniak River	NA	M	++
CMANI92_0075	Aniak River	NA	M	++
CMANI92_0076	Aniak River	NA	M	++
CMANI92_0077	Aniak River	NA	M	++
CMANI92_0078	Aniak River	NA	F	++
CMANI92_0079	Aniak River	NA	M	++
CMANI92_0080	Aniak River	NA	M	++
CMANI92_0081	Aniak River	NA	M	+-
CMANI92_0082	Aniak River	NA	F	++
CMANI92_0085	Aniak River	NA	M	++
CMANI92_0086	Aniak River	NA	F	++
CMANI92_0088	Aniak River	NA	M	++
CMANI92_0089	Aniak River	NA	F	++
CMANI92_0090	Aniak River	NA	M	++
CMANI92_0091	Aniak River	NA	F	++
CMANI92_0093	Aniak River	NA	F	++
CMANI92_0094	Aniak River	NA	F	+-
CMANDR04E_0001	East Fork Andreafsky	NA	F	++
CMANDR04E_0002	East Fork Andreafsky	NA	F	++
CMANDR04E_0003	East Fork Andreafsky	NA	F	++
CMANDR04E_0004	East Fork Andreafsky	NA	F	++
CMANDR04E_0005	East Fork Andreafsky	NA	F	+-
CMANDR04E_0006	East Fork Andreafsky	NA	F	++
CMANDR04E_0007	East Fork Andreafsky	NA	M	++
CMANDR04E_0008	East Fork Andreafsky	NA	F	++
CMANDR04E_0009	East Fork Andreafsky	NA	F	++
CMANDR04E_0010	East Fork Andreafsky	NA	F	+-
CMANDR04E_0011	East Fork Andreafsky	NA	F	++
CMANDR04E_0012	East Fork Andreafsky	NA	M	++
CMANDR04E_0013	East Fork Andreafsky	NA	F	++
CMANDR04E_0014	East Fork Andreafsky	NA	F	++
CMANDR04E_0015	East Fork Andreafsky	NA	F	++
CMANDR04E_0016	East Fork Andreafsky	NA	F	++
CMANDR04E_0017	East Fork Andreafsky	NA	F	++
CMANDR04E_0018	East Fork Andreafsky	NA	F	+-
CMANDR04E_0019	East Fork Andreafsky	NA	M	++
CMANDR04E_0020	East Fork Andreafsky	NA	M	++
CMANDR04E_0021	East Fork Andreafsky	NA	M	++
CMANDR04E_0022	East Fork Andreafsky	NA	M	+-
CMANDR04E_0023	East Fork Andreafsky	NA	M	++
CMANDR04E_0024	East Fork Andreafsky	NA	F	++
CMANDR04E_0025	East Fork Andreafsky	NA	F	++
CMANDR04E_0026	East Fork Andreafsky	NA	F	++
CMANDR04E_0027	East Fork Andreafsky	NA	M	++
CMANDR04E_0028	East Fork Andreafsky	NA	M	+-
CMANDR04E_0029	East Fork Andreafsky	NA	M	++
CMANDR04E_0030	East Fork Andreafsky	NA	M	++
CMANDR04E_0031	East Fork Andreafsky	NA	F	++
CMANDR04E_0032	East Fork Andreafsky	NA	M	++
CMANDR04E_0033	East Fork Andreafsky	NA	F	++
CMANDR04E_0034	East Fork Andreafsky	NA	F	++
CMANDR04E_0035	East Fork Andreafsky	NA	M	+-
CMANDR04E_0036	East Fork Andreafsky	NA	F	++
CMANDR04E_0037	East Fork Andreafsky	NA	M	++
CMANDR04E_0038	East Fork Andreafsky	NA	F	++
CMANDR04E_0039	East Fork Andreafsky	NA	F	++
CMANDR04E_0040	East Fork Andreafsky	NA	M	++
CMANDR04E_0041	East Fork Andreafsky	NA	F	++
CMANDR04E_0042	East Fork Andreafsky	NA	F	+-
CMANDR04E_0043	East Fork Andreafsky	NA	M	++
CMANDR04E_0044	East Fork Andreafsky	NA	M	++
CMANDR04E_0045	East Fork Andreafsky	NA	F	++
CMANDR04E_0046	East Fork Andreafsky	NA	F	++
CMANDR04E_0047	East Fork Andreafsky	NA	M	++
CMANDR04E_0048	East Fork Andreafsky	NA	F	+-
CMANDR04E_0049	East Fork Andreafsky	NA	M	+-
CMANDR04E_0050	East Fork Andreafsky	NA	F	++
CMANDR04E_0051	East Fork Andreafsky	NA	M	++
CMANDR04E_0052	East Fork Andreafsky	NA	M	++
CMANDR04E_0053	East Fork Andreafsky	NA	M	++
CMANDR04E_0054	East Fork Andreafsky	NA	F	+-
CMANDR04E_0055	East Fork Andreafsky	NA	M	++
CMANDR04E_0056	East Fork Andreafsky	NA	F	++
CMANDR04E_0057	East Fork Andreafsky	NA	F	++
CMANDR04E_0058	East Fork Andreafsky	NA	F	++
CMANDR04E_0059	East Fork Andreafsky	NA	F	++
CMANDR04E_0060	East Fork Andreafsky	NA	M	++
CMANDR04E_0061	East Fork Andreafsky	NA	F	+-
CMANDR04E_0062	East Fork Andreafsky	NA	F	++
CMANDR04E_0063	East Fork Andreafsky	NA	M	++
CMANDR04E_0064	East Fork Andreafsky	NA	F	++
CMANDR04E_0065	East Fork Andreafsky	NA	M	++
CMANDR04E_0066	East Fork Andreafsky	NA	F	++
CMANDR04E_0067	East Fork Andreafsky	NA	M	++
CMANDR04E_0068	East Fork Andreafsky	NA	M	++
CMANDR04E_0069	East Fork Andreafsky	NA	M	++
CMANDR04E_0070	East Fork Andreafsky	NA	M	++
CMANDR04E_0071	East Fork Andreafsky	NA	M	++
CMANDR04E_0072	East Fork Andreafsky	NA	F	+-
CMANDR04E_0073	East Fork Andreafsky	NA	M	++
CMANDR04E_0074	East Fork Andreafsky	NA	M	+-
CMANDR04E_0075	East Fork Andreafsky	NA	F	++
CMANDR04E_0076	East Fork Andreafsky	NA	M	++
CMANDR04E_0077	East Fork Andreafsky	NA	F	++
CMANDR04E_0078	East Fork Andreafsky	NA	F	+-
CMANDR04E_0079	East Fork Andreafsky	NA	M	++
CMANDR04E_0080	East Fork Andreafsky	NA	F	++
CMANDR04E_0086qc	East Fork Andreafsky	NA	M	++
CMANDR04E_0094qc	East Fork Andreafsky	NA	F	++
CMANDR04E_0150qc	East Fork Andreafsky	NA	M	++
CMELDO05_0001	Eldorado River	NA	M	++
CMELDO05_0002	Eldorado River	NA	F	++
CMELDO05_0003	Eldorado River	NA	M	++
CMELDO05_0004	Eldorado River	NA	M	++
CMELDO05_0005	Eldorado River	NA	F	++
CMELDO05_0006	Eldorado River	NA	F	++
CMELDO05_0007	Eldorado River	NA	F	++
CMELDO05_0008	Eldorado River	NA	M	++
CMELDO05_0010	Eldorado River	NA	F	++
CMELDO05_0012	Eldorado River	NA	M	++
CMELDO05_0013	Eldorado River	NA	M	++
CMELDO05_0014	Eldorado River	NA	M	++
CMELDO05_0015	Eldorado River	NA	M	++
CMELDO05_0016	Eldorado River	NA	F	++
CMELDO05_0017	Eldorado River	NA	M	+-
CMELDO05_0018	Eldorado River	NA	F	++
CMELDO05_0019	Eldorado River	NA	F	++
CMELDO05_0021	Eldorado River	NA	M	++
CMELDO05_0023	Eldorado River	NA	M	++
CMELDO05_0025	Eldorado River	NA	M	++
CMELDO05_0029	Eldorado River	NA	F	++
CMELDO05_0033	Eldorado River	NA	F	++
CMELDO05_0041	Eldorado River	NA	F	++
CMELDO05_0044	Eldorado River	NA	F	++
CMELDO05_0045	Eldorado River	NA	F	++
CMELDO05_0049	Eldorado River	NA	F	++
CMELDO05_0050	Eldorado River	NA	F	++
CMELDO05_0057	Eldorado River	NA	F	++
CMELDO05_0059	Eldorado River	NA	F	++
CMELDO05_0061	Eldorado River	NA	F	++
CMELDO05_0064	Eldorado River	NA	M	++
CMELDO05_0065	Eldorado River	NA	F	++
CMELDO05_0085qc	Eldorado River	NA	M	++
CMELDO05_0093qc	Eldorado River	NA	M	++
CMELDO05_0096	Eldorado River	NA	M	++
CMELDO05_0097	Eldorado River	NA	F	++
CMELDO05_0098	Eldorado River	NA	F	++
CMELDO05_0099	Eldorado River	NA	F	++
CMELDO05_0100	Eldorado River	NA	F	++
CMELDO05_0101	Eldorado River	NA	M	+-
CMELDO05_0102	Eldorado River	NA	M	++
CMELDO05_0103	Eldorado River	NA	F	++
CMELDO05_0104	Eldorado River	NA	F	++
CMELDO05_0105	Eldorado River	NA	F	++
CMELDO05_0106	Eldorado River	NA	F	++
CMELDO05_0107	Eldorado River	NA	F	++
CMELDO05_0108	Eldorado River	NA	F	++
CMELDO05_0109	Eldorado River	NA	F	++
CMELDO05_0110	Eldorado River	NA	F	++
CMELDO05_0111	Eldorado River	NA	M	+-
CMELDO05_0112	Eldorado River	NA	F	++
CMELDO05_0113	Eldorado River	NA	M	++
CMELDO05_0114	Eldorado River	NA	F	++
CMELDO05_0115	Eldorado River	NA	M	++
CMELDO05_0116	Eldorado River	NA	F	++
CMELDO05_0117	Eldorado River	NA	M	++
CMELDO05_0118	Eldorado River	NA	F	++
CMELDO05_0119	Eldorado River	NA	F	++
CMELDO05_0120	Eldorado River	NA	M	++
CMELDO05_0121	Eldorado River	NA	F	++
CMELDO05_0122	Eldorado River	NA	M	++
CMELDO05_0123	Eldorado River	NA	M	++
CMELDO05_0124	Eldorado River	NA	F	++
CMELDO05_0125	Eldorado River	NA	F	++
CMELDO05_0126	Eldorado River	NA	F	++
CMELDO05_0127	Eldorado River	NA	M	++
CMELDO05_0128	Eldorado River	NA	F	++
CMELDO05_0129	Eldorado River	NA	F	++
CMELDO05_0130	Eldorado River	NA	F	++
CMELDO05_0131	Eldorado River	NA	F	++
CMELDO05_0132	Eldorado River	NA	F	++
CMELDO05_0133	Eldorado River	NA	M	++
CMELDO05_0134	Eldorado River	NA	F	++
CMELDO05_0135	Eldorado River	NA	F	++
CMELDO05_0136	Eldorado River	NA	F	++
CMELDO05_0137	Eldorado River	NA	F	++
CMELDO05_0138	Eldorado River	NA	F	++
CMELDO05_0139	Eldorado River	NA	F	++
CMELDO05_0140	Eldorado River	NA	F	++
CMELDO05_0141	Eldorado River	NA	F	++
CMELDO05_0142	Eldorado River	NA	M	++
CMELDO05_0143	Eldorado River	NA	F	++
CMFISH04_0002	Fish River	M	M	++
CMFISH04_0006	Fish River	F	F	++
CMFISH04_0010	Fish River	F	F	++
CMFISH04_0013	Fish River	NA	F	++
CMFISH04_0014	Fish River	NA	M	+-
CMFISH04_0015	Fish River	NA	F	++
CMFISH04_0019	Fish River	F	F	++
CMFISH04_0020	Fish River	F	M	+-
CMFISH04_0022	Fish River	M	M	++
CMFISH04_0023	Fish River	M	M	++
CMFISH04_0025	Fish River	F	F	++
CMFISH04_0026	Fish River	F	F	+-
CMFISH04_0027	Fish River	F	F	++
CMFISH04_0028	Fish River	F	F	++
CMFISH04_0031	Fish River	F	F	++
CMFISH04_0034	Fish River	NA	M	++
CMFISH04_0038	Fish River	M	M	++
CMFISH04_0040	Fish River	F	F	++
CMFISH04_0043	Fish River	F	F	++
CMFISH04_0044	Fish River	F	F	++
CMFISH04_0047	Fish River	M	F	++
CMFISH04_0049	Fish River	M	M	++
CMFISH04_0052	Fish River	M	M	++
CMFISH04_0056	Fish River	F	F	++
CMFISH04_0060	Fish River	F	M	++
CMFISH04_0065	Fish River	M	M	++
CMFISH04_0067	Fish River	M	F	+-
CMFISH04_0068	Fish River	F	F	++
CMFISH04_0070	Fish River	F	M	++
CMFISH04_0071	Fish River	M	F	++
CMFISH04_0072	Fish River	F	M	++
CMFISH04_0075	Fish River	M	F	++
CMFISH04_0086qc	Fish River	NA	F	++
CMFISH04_0094qc	Fish River	NA	F	++
CMFISH04_0097	Fish River	M	M	++
CMFISH04_0098	Fish River	F	F	+-
CMFISH04_0099	Fish River	F	F	++
CMFISH04_0100	Fish River	F	F	++
CMFISH04_0101	Fish River	F	F	++
CMFISH04_0102	Fish River	M	M	++
CMFISH04_0103	Fish River	M	M	++
CMFISH04_0104	Fish River	F	F	++
CMFISH04_0105	Fish River	M	M	++
CMFISH04_0106	Fish River	M	M	++
CMFISH04_0107	Fish River	M	F	++
CMFISH04_0108	Fish River	M	M	++
CMFISH04_0109	Fish River	F	F	++
CMFISH04_0110	Fish River	M	M	++
CMFISH04_0111	Fish River	F	F	+-
CMFISH04_0112	Fish River	M	M	++
CMFISH04_0113	Fish River	F	F	++
CMFISH04_0114	Fish River	F	F	+-
CMFISH04_0115	Fish River	F	F	++
CMFISH04_0116	Fish River	F	F	++
CMFISH04_0117	Fish River	F	F	+-
CMFISH04_0118	Fish River	M	M	++
CMFISH04_0119	Fish River	M	M	+-
CMFISH04_0120	Fish River	F	F	++
CMFISH04_0121	Fish River	F	F	++
CMFISH04_0123	Fish River	M	M	+-
CMFISH04_0125	Fish River	M	F	++
CMFISH04_0126	Fish River	M	M	++
CMFISH04_0127	Fish River	M	M	++
CMFISH04_0128	Fish River	M	F	++
CMFISH04_0129	Fish River	F	F	++
CMFISH04_0130	Fish River	M	M	++
CMFISH04_0132	Fish River	M	F	++
CMFISH04_0135	Fish River	M	M	++
CMFISH04_0136	Fish River	M	M	++
CMFISH04_0137	Fish River	M	M	++
CMFISH04_0138	Fish River	F	F	++
CMFISH04_0139	Fish River	F	F	++
CMFISH04_0140	Fish River	M	M	++
CMFISH04_0141	Fish River	F	F	++
CMFISH04_0142	Fish River	F	F	++
CMFISH04_0143	Fish River	M	M	++
CMFISH04_0144	Fish River	F	F	++
CMHOL07_0001	Holokuk River	NA	M	++
CMHOL07_0002	Holokuk River	NA	F	+-
CMHOL07_0003	Holokuk River	NA	M	++
CMHOL07_0004	Holokuk River	NA	M	++
CMHOL07_0005	Holokuk River	NA	F	++
CMHOL07_0006	Holokuk River	NA	M	++
CMHOL07_0007	Holokuk River	NA	F	++
CMHOL07_0008	Holokuk River	NA	F	--
CMHOL07_0009	Holokuk River	NA	F	++
CMHOL07_0010	Holokuk River	NA	F	++
CMHOL07_0011	Holokuk River	NA	F	++
CMHOL07_0012	Holokuk River	NA	F	++
CMHOL07_0013	Holokuk River	NA	F	++
CMHOL07_0014	Holokuk River	NA	F	++
CMHOL07_0015	Holokuk River	NA	F	++
CMHOL07_0016	Holokuk River	NA	F	++
CMHOL07_0017	Holokuk River	NA	F	++
CMHOL07_0018	Holokuk River	NA	F	++
CMHOL07_0020	Holokuk River	NA	M	++
CMHOL07_0021	Holokuk River	NA	F	++
CMHOL07_0022	Holokuk River	NA	M	++
CMHOL07_0023	Holokuk River	NA	F	++
CMHOL07_0024	Holokuk River	NA	F	++
CMHOL07_0025	Holokuk River	NA	F	++
CMHOL07_0026	Holokuk River	NA	F	++
CMHOL07_0028	Holokuk River	NA	F	++
CMHOL07_0029	Holokuk River	NA	M	++
CMHOL07_0030	Holokuk River	NA	F	+-
CMHOL07_0031	Holokuk River	NA	F	++
CMHOL07_0032	Holokuk River	NA	F	++
CMHOL07_0033	Holokuk River	NA	F	++
CMHOL07_0034	Holokuk River	NA	M	++
CMHOL07_0035	Holokuk River	NA	M	++
CMHOL07_0036	Holokuk River	NA	F	++
CMHOL07_0037	Holokuk River	NA	F	+-
CMHOL07_0038	Holokuk River	NA	F	++
CMHOL07_0039	Holokuk River	NA	M	++
CMHOL07_0040	Holokuk River	NA	M	++
CMHOL07_0041	Holokuk River	NA	F	++
CMHOL07_0042	Holokuk River	NA	F	++
CMHOL07_0043	Holokuk River	NA	F	+-
CMHOL07_0044	Holokuk River	NA	F	++
CMHOL07_0045	Holokuk River	NA	M	++
CMHOL07_0046	Holokuk River	NA	F	++
CMHOL07_0047	Holokuk River	NA	M	++
CMHOL08_0001	Holokuk River	NA	M	++
CMHOL08_0003	Holokuk River	NA	M	++
CMHOL08_0004	Holokuk River	NA	F	++
CMHOL08_0006qc	Holokuk River	NA	F	++
CMHOL08_0011	Holokuk River	NA	M	++
CMHOL08_0012	Holokuk River	NA	M	++
CMHOL08_0014	Holokuk River	NA	F	++
CMHOL08_0022	Holokuk River	NA	M	++
CMHOL08_0025	Holokuk River	NA	F	++
CMHOL08_0028	Holokuk River	NA	M	++
CMHOL08_0032	Holokuk River	NA	M	++
CMHOL08_0035	Holokuk River	NA	F	++
CMHOL08_0036	Holokuk River	NA	F	++
CMHOL08_0038	Holokuk River	NA	F	++
CMHOL08_0039	Holokuk River	NA	F	++
CMHOL08_0040	Holokuk River	NA	F	++
CMHOL08_0041	Holokuk River	NA	F	++
CMHOL08_0044	Holokuk River	NA	F	++
CMHOL08_0045	Holokuk River	NA	F	++
CMHOL08_0046	Holokuk River	NA	M	++
CMHOL08_0047	Holokuk River	NA	M	++
CMHOL08_0048	Holokuk River	NA	F	++
CMHOL08_0051	Holokuk River	NA	M	++
CMHOL08_0052	Holokuk River	NA	M	++
CMHOL08_0053	Holokuk River	NA	F	++
CMHOL08_0054	Holokuk River	NA	F	++
CMHOL08_0055	Holokuk River	NA	M	++
CMHOL08_0056	Holokuk River	NA	M	++
CMHOL08_0057	Holokuk River	NA	M	++
CMHOL08_0059	Holokuk River	NA	M	++
CMHOL08_0061	Holokuk River	NA	M	++
CMHOL08_0062	Holokuk River	NA	M	++
CMHOL08_0085qc	Holokuk River	NA	F	++
CMHOL08_0093qc	Holokuk River	NA	F	+-
CMKOKW11_0001	Kokwok River	NA	M	++
CMKOKW11_0002	Kokwok River	NA	M	++
CMKOKW11_0003	Kokwok River	NA	F	++
CMKOKW11_0004	Kokwok River	NA	F	++
CMKOKW11_0005	Kokwok River	NA	M	++
CMKOKW11_0006	Kokwok River	NA	M	++
CMKOKW11_0008	Kokwok River	NA	M	++
CMKOKW11_0009	Kokwok River	NA	M	++
CMKOKW11_0010	Kokwok River	NA	M	++
CMKOKW11_0012	Kokwok River	NA	M	++
CMKOKW11_0013	Kokwok River	NA	M	++
CMKOKW11_0014	Kokwok River	NA	M	++
CMKOKW11_0016	Kokwok River	NA	M	++
CMKOKW11_0017	Kokwok River	NA	M	++
CMKOKW11_0018	Kokwok River	NA	M	++
CMKOKW11_0019	Kokwok River	NA	M	++
CMKOKW11_0020	Kokwok River	NA	F	++
CMKOKW11_0021	Kokwok River	NA	F	+-
CMKOKW11_0022	Kokwok River	NA	M	++
CMKOKW11_0023	Kokwok River	NA	F	++
CMKOKW11_0024	Kokwok River	NA	M	++
CMKOKW11_0025	Kokwok River	NA	M	++
CMKOKW11_0026	Kokwok River	NA	F	++
CMKOKW11_0027	Kokwok River	NA	F	++
CMKOKW11_0028	Kokwok River	NA	M	++
CMKOKW11_0029	Kokwok River	NA	M	++
CMKOKW11_0030	Kokwok River	NA	M	++
CMKOKW11_0031	Kokwok River	NA	M	++
CMKOKW11_0032	Kokwok River	NA	M	++
CMKOKW11_0033	Kokwok River	NA	F	++
CMKOKW11_0034	Kokwok River	NA	M	++
CMKOKW11_0035	Kokwok River	NA	M	++
CMKOKW11_0036	Kokwok River	NA	F	++
CMKOKW11_0037	Kokwok River	NA	M	++
CMKOKW11_0038	Kokwok River	NA	M	++
CMKOKW11_0039	Kokwok River	NA	M	++
CMKOKW11_0040	Kokwok River	NA	M	++
CMKOKW11_0041	Kokwok River	NA	M	++
CMKOKW11_0042	Kokwok River	NA	M	++
CMKOKW11_0044	Kokwok River	NA	M	++
CMKOKW11_0048	Kokwok River	NA	M	++
CMKOKW11_0049	Kokwok River	NA	M	++
CMKOKW11_0050	Kokwok River	NA	M	++
CMKOKW11_0051	Kokwok River	NA	M	++
CMKOKW11_0052qc	Kokwok River	NA	F	++
CMKOKW11_0055	Kokwok River	NA	M	++
CMKOKW11_0056	Kokwok River	NA	M	++
CMKOKW11_0057	Kokwok River	NA	M	++
CMKOKW11_0058	Kokwok River	NA	M	++
CMKOKW11_0062	Kokwok River	NA	M	++
CMKOKW11_0063	Kokwok River	NA	F	++
CMKOKW11_0064	Kokwok River	NA	M	++
CMKOKW11_0066	Kokwok River	NA	M	++
CMKOKW11_0072	Kokwok River	NA	M	++
CMKOKW11_0073	Kokwok River	NA	M	++
CMKOKW11_0075	Kokwok River	NA	M	++
CMKOKW11_0076	Kokwok River	NA	F	++
CMKOKW11_0077	Kokwok River	NA	M	++
CMKOKW11_0080	Kokwok River	NA	F	++
CMKOKW11_0081	Kokwok River	NA	M	++
CMKOKW11_0083	Kokwok River	NA	M	++
CMKOKW11_0084	Kokwok River	NA	M	++
CMKOKW11_0085	Kokwok River	NA	M	++
CMKOKW11_0086	Kokwok River	NA	F	+-
CMKOKW11_0087	Kokwok River	NA	M	++
CMKOKW11_0088	Kokwok River	NA	M	++
CMKOKW11_0089	Kokwok River	NA	M	++
CMKOKW11_0090	Kokwok River	NA	F	++
CMKOKW11_0131qc	Kokwok River	NA	M	++
CMKOKW11_0134	Kokwok River	NA	F	++
CMKOKW11_0135	Kokwok River	NA	M	+-
CMKOKW11_0136	Kokwok River	NA	F	++
CMKOKW11_0137	Kokwok River	NA	M	++
CMKOKW11_0138	Kokwok River	NA	M	++
CMKOKW11_0139	Kokwok River	NA	M	++
CMKOKW11_0140	Kokwok River	NA	M	++
CMKOKW11_0141	Kokwok River	NA	M	++
CMKOKW11_0142	Kokwok River	NA	M	++
CMKOKW11_0143	Kokwok River	NA	M	++
CMKWI94_0001	Kwiniuk River	M	M	++
CMKWI94_0002	Kwiniuk River	M	M	++
CMKWI94_0003	Kwiniuk River	M	M	++
CMKWI94_0004	Kwiniuk River	M	M	++
CMKWI94_0005	Kwiniuk River	M	M	++
CMKWI94_0006	Kwiniuk River	M	M	++
CMKWI94_0007	Kwiniuk River	M	F	++
CMKWI94_0008	Kwiniuk River	M	M	++
CMKWI94_0009	Kwiniuk River	F	F	++
CMKWI94_0013	Kwiniuk River	F	F	++
CMKWI94_0014	Kwiniuk River	F	F	++
CMKWI94_0015	Kwiniuk River	F	F	++
CMKWI94_0016	Kwiniuk River	F	F	++
CMKWI94_0017	Kwiniuk River	F	F	++
CMKWI94_0018	Kwiniuk River	F	F	++
CMKWI94_0019	Kwiniuk River	M	M	++
CMKWI94_0020	Kwiniuk River	M	M	++
CMKWI94_0021	Kwiniuk River	M	M	++
CMKWI94_0025	Kwiniuk River	M	M	++
CMKWI94_0026	Kwiniuk River	M	M	++
CMKWI94_0027	Kwiniuk River	M	M	++
CMKWI94_0028	Kwiniuk River	M	M	+-
CMKWI94_0029	Kwiniuk River	M	F	++
CMKWI94_0030	Kwiniuk River	F	F	+-
CMKWI94_0031	Kwiniuk River	F	F	++
CMKWI94_0032	Kwiniuk River	F	F	+-
CMKWI94_0033	Kwiniuk River	F	F	++
CMKWI94_0034	Kwiniuk River	F	F	++
CMKWI94_0037	Kwiniuk River	F	F	++
CMKWI94_0038	Kwiniuk River	F	F	++
CMKWI94_0039	Kwiniuk River	F	F	++
CMKWI94_0040	Kwiniuk River	F	F	+-
CMKWI94_0041	Kwiniuk River	F	F	++
CMKWI94_0042	Kwiniuk River	F	F	+-
CMKWI94_0043	Kwiniuk River	F	F	++
CMKWI94_0044	Kwiniuk River	F	F	++
CMKWI94_0045	Kwiniuk River	F	F	++
CMKWI94_0046	Kwiniuk River	F	F	++
CMKWI94_0049	Kwiniuk River	F	F	++
CMKWI94_0050	Kwiniuk River	F	M	++
CMKWI94_0051	Kwiniuk River	M	M	++
CMKWI94_0052	Kwiniuk River	M	M	++
CMKWI94_0053	Kwiniuk River	M	M	++
CMKWI94_0054	Kwiniuk River	M	F	++
CMKWI94_0055	Kwiniuk River	M	F	++
CMKWI94_0056	Kwiniuk River	M	M	++
CMKWI94_0057	Kwiniuk River	M	F	++
CMKWI94_0058	Kwiniuk River	M	M	++
CMKWI94_0061	Kwiniuk River	F	F	++
CMKWI94_0062	Kwiniuk River	F	F	++
CMKWI94_0063	Kwiniuk River	F	F	++
CMKWI94_0064	Kwiniuk River	F	F	++
CMKWI94_0065	Kwiniuk River	F	F	++
CMKWI94_0066	Kwiniuk River	F	F	++
CMKWI94_0067	Kwiniuk River	F	F	++
CMKWI94_0068	Kwiniuk River	F	F	++
CMKWI94_0069	Kwiniuk River	F	F	++
CMKWI94_0070	Kwiniuk River	F	F	+-
CMKWI94_0072qc	Kwiniuk River	NA	F	++
CMKWI94_0074	Kwiniuk River	M	M	++
CMKWI94_0075	Kwiniuk River	M	M	++
CMKWI94_0076	Kwiniuk River	M	M	++
CMKWI94_0081	Kwiniuk River	M	F	++
CMKWI94_0082	Kwiniuk River	M	M	++
CMKWI94_0085	Kwiniuk River	M	M	++
CMKWI94_0086	Kwiniuk River	M	M	++
CMKWI94_0087	Kwiniuk River	M	M	++
CMKWI94_0088	Kwiniuk River	M	M	++
CMKWI94_0089	Kwiniuk River	M	M	++
CMKWI94_0090	Kwiniuk River	M	M	++
CMKWI94_0091	Kwiniuk River	M	F	++
CMKWI94_0092	Kwiniuk River	F	F	++
CMKWI94_0093	Kwiniuk River	F	F	++
CMKWI94_0094	Kwiniuk River	F	F	++
CMMUL94_0001	Mulchatna River	M	M	++
CMMUL94_0003	Mulchatna River	M	M	++
CMMUL94_0004	Mulchatna River	F	F	+-
CMMUL94_0005	Mulchatna River	F	F	++
CMMUL94_0006	Mulchatna River	F	F	++
CMMUL94_0007	Mulchatna River	F	F	++
CMMUL94_0008	Mulchatna River	F	F	++
CMMUL94_0009	Mulchatna River	M	M	++
CMMUL94_0010	Mulchatna River	M	M	++
CMMUL94_0013	Mulchatna River	M	M	+-
CMMUL94_0014	Mulchatna River	F	F	++
CMMUL94_0015	Mulchatna River	F	F	++
CMMUL94_0016	Mulchatna River	F	F	++
CMMUL94_0017	Mulchatna River	F	F	++
CMMUL94_0018	Mulchatna River	F	F	+-
CMMUL94_0019	Mulchatna River	F	F	++
CMMUL94_0020	Mulchatna River	F	F	++
CMMUL94_0021	Mulchatna River	F	F	++
CMMUL94_0022	Mulchatna River	F	F	++
CMMUL94_0025	Mulchatna River	F	F	++
CMMUL94_0027	Mulchatna River	M	M	+-
CMMUL94_0028	Mulchatna River	M	M	++
CMMUL94_0029	Mulchatna River	M	M	++
CMMUL94_0030	Mulchatna River	M	M	++
CMMUL94_0031	Mulchatna River	M	M	++
CMMUL94_0032	Mulchatna River	M	M	++
CMMUL94_0033	Mulchatna River	M	M	++
CMMUL94_0037	Mulchatna River	M	M	++
CMMUL94_0038	Mulchatna River	M	M	++
CMMUL94_0039	Mulchatna River	M	M	++
CMMUL94_0040	Mulchatna River	M	M	++
CMMUL94_0042	Mulchatna River	F	F	++
CMMUL94_0043	Mulchatna River	F	F	++
CMMUL94_0044	Mulchatna River	F	F	++
CMMUL94_0045	Mulchatna River	F	F	++
CMMUL94_0046	Mulchatna River	F	F	++
CMMUL94_0049	Mulchatna River	F	F	++
CMMUL94_0050	Mulchatna River	F	F	++
CMMUL94_0051	Mulchatna River	F	F	++
CMMUL94_0052	Mulchatna River	F	M	++
CMMUL94_0053	Mulchatna River	F	F	+-
CMMUL94_0054	Mulchatna River	F	F	++
CMMUL94_0055	Mulchatna River	F	F	++
CMMUL94_0056	Mulchatna River	F	F	++
CMMUL94_0057	Mulchatna River	M	M	+-
CMMUL94_0058	Mulchatna River	M	M	++
CMMUL94_0061	Mulchatna River	M	M	++
CMMUL94_0062	Mulchatna River	M	M	++
CMMUL94_0064	Mulchatna River	M	M	++
CMMUL94_0065	Mulchatna River	M	M	++
CMMUL94_0066	Mulchatna River	M	M	++
CMMUL94_0067	Mulchatna River	M	M	++
CMMUL94_0068	Mulchatna River	M	M	++
CMMUL94_0069	Mulchatna River	F	F	++
CMMUL94_0070	Mulchatna River	F	F	++
CMMUL94_0071qc	Mulchatna River	NA	M	++
CMMUL94_0072qc	Mulchatna River	NA	M	++
CMMUL94_0075	Mulchatna River	F	F	++
CMMUL94_0076	Mulchatna River	F	F	+-
CMMUL94_0077	Mulchatna River	F	F	++
CMMUL94_0078	Mulchatna River	F	F	++
CMMUL94_0079	Mulchatna River	F	F	++
CMMUL94_0080	Mulchatna River	M	M	++
CMMUL94_0081	Mulchatna River	F	F	++
CMMUL94_0082	Mulchatna River	M	M	++
CMMUL94_0085	Mulchatna River	F	F	++
CMMUL94_0093	Mulchatna River	M	M	++
CMMUL94_0094	Mulchatna River	M	M	++
CMMUL94_0095	Mulchatna River	M	M	++
CMMUL94_0096	Mulchatna River	M	M	++
CMMUL94_0097	Mulchatna River	M	M	++
CMMUL94_0098	Mulchatna River	M	M	++
CMMUL94_0099	Mulchatna River	M	M	++
CMNUL03_0001	Nulato River	NA	F	++
CMNUL03_0005	Nulato River	NA	M	++
CMNUL03_0006	Nulato River	NA	F	++
CMNUL03_0007	Nulato River	NA	M	++
CMNUL03_0009	Nulato River	NA	M	++
CMNUL03_0012	Nulato River	NA	F	++
CMNUL03_0014qc	Nulato River	NA	F	++
CMNUL03_0018	Nulato River	NA	F	++
CMNUL03_0019	Nulato River	NA	M	+-
CMNUL03_0022	Nulato River	NA	M	++
CMNUL03_0024	Nulato River	NA	F	+-
CMNUL03_0025	Nulato River	NA	F	+-
CMNUL03_0026	Nulato River	NA	F	++
CMNUL03_0027	Nulato River	NA	F	+-
CMNUL03_0029	Nulato River	NA	F	++
CMNUL03_0030	Nulato River	NA	M	+-
CMNUL03_0032	Nulato River	NA	F	++
CMNUL03_0034	Nulato River	NA	M	+-
CMNUL03_0040	Nulato River	NA	M	++
CMNUL03_0043	Nulato River	NA	M	+-
CMNUL03_0046	Nulato River	NA	M	++
CMNUL03_0048	Nulato River	NA	F	++
CMNUL03_0049	Nulato River	NA	F	+-
CMNUL03_0051	Nulato River	NA	F	--
CMNUL03_0052	Nulato River	NA	F	++
CMNUL03_0055	Nulato River	NA	F	++
CMNUL03_0063	Nulato River	NA	M	++
CMNUL03_0069	Nulato River	NA	F	++
CMNUL03_0070	Nulato River	NA	M	+-
CMNUL03_0071	Nulato River	NA	M	++
CMNUL03_0072	Nulato River	NA	M	++
CMNUL03_0074	Nulato River	NA	F	++
CMNUL03_0076	Nulato River	NA	M	++
CMNUL03_0078	Nulato River	NA	M	++
CMNUL03_0079	Nulato River	NA	F	++
CMNUL03_0080	Nulato River	NA	M	++
CMNUL03_0081	Nulato River	NA	F	++
CMNUL03_0082	Nulato River	NA	F	++
CMNUL03_0083	Nulato River	NA	M	++
CMNUL03_0084	Nulato River	NA	M	++
CMNUL03_0085	Nulato River	NA	F	+-
CMNUL03_0086	Nulato River	NA	M	++
CMNUL03_0087	Nulato River	NA	F	++
CMNUL03_0088	Nulato River	NA	F	++
CMNUL03_0091	Nulato River	NA	M	++
CMNUL03_0093	Nulato River	NA	M	++
CMNUL03_0094	Nulato River	NA	F	+-
CMNUL03_0095	Nulato River	NA	M	++
CMNUL03_0096	Nulato River	NA	F	+-
CMNUL03_0097	Nulato River	NA	M	+-
CMNUL03_0100	Nulato River	NA	M	++
CMNUL94_0001	Nulato River	NA	F	++
CMNUL94_0002	Nulato River	NA	M	++
CMNUL94_0003	Nulato River	NA	M	+-
CMNUL94_0004	Nulato River	NA	M	+-
CMNUL94_0005	Nulato River	NA	M	++
CMNUL94_0006	Nulato River	NA	M	++
CMNUL94_0007	Nulato River	NA	F	+-
CMNUL94_0008	Nulato River	NA	M	++
CMNUL94_0009	Nulato River	NA	M	++
CMNUL94_0010	Nulato River	NA	F	++
CMNUL94_0011	Nulato River	NA	M	++
CMNUL94_0012	Nulato River	NA	M	++
CMNUL94_0013	Nulato River	NA	M	++
CMNUL94_0014	Nulato River	NA	F	++
CMNUL94_0015	Nulato River	NA	M	++
CMNUL94_0016	Nulato River	NA	M	++
CMNUL94_0018	Nulato River	NA	F	++
CMNUL94_0020	Nulato River	NA	M	++
CMNUL94_0021	Nulato River	NA	F	++
CMNUL94_0022	Nulato River	NA	M	++
CMNUL94_0023	Nulato River	NA	M	+-
CMNUL94_0024	Nulato River	NA	M	++
CMNUL94_0025	Nulato River	NA	M	++
CMNUL94_0026	Nulato River	NA	M	++
CMNUL94_0027	Nulato River	NA	M	++
CMNUL94_0028	Nulato River	NA	M	+-
CMNUL94_0029	Nulato River	NA	M	++
CMNUL94_0085qc	Nulato River	NA	M	++
CMNUL94_0093qc	Nulato River	NA	M	++
CMOTT93_0002	Otter Creek	NA	F	++
CMOTT93_0010	Otter Creek	NA	M	++
CMOTT93_0014	Otter Creek	NA	F	++
CMOTT93_0016	Otter Creek	NA	F	+-
CMOTT93_0018	Otter Creek	NA	M	++
CMOTT93_0019	Otter Creek	NA	M	++
CMOTT93_0020	Otter Creek	NA	M	++
CMOTT93_0025	Otter Creek	NA	M	+-
CMOTT93_0028	Otter Creek	NA	M	++
CMOTT93_0035	Otter Creek	NA	F	++
CMOTT93_0037	Otter Creek	NA	F	+-
CMOTT93_0038	Otter Creek	NA	M	++
CMOTT93_0042	Otter Creek	NA	F	++
CMOTT93_0048	Otter Creek	NA	F	++
CMOTT93_0050	Otter Creek	NA	F	++
CMOTT93_0051qc	Otter Creek	NA	M	++
CMOTT93_0053	Otter Creek	NA	M	++
CMOTT93_0054	Otter Creek	NA	F	++
CMOTT93_0057	Otter Creek	NA	M	++
CMOTT93_0059	Otter Creek	NA	M	++
CMOTT93_0060	Otter Creek	NA	M	+-
CMOTT93_0061	Otter Creek	NA	M	++
CMOTT93_0062	Otter Creek	NA	M	+-
CMOTT93_0065	Otter Creek	NA	M	+-
CMOTT93_0068	Otter Creek	NA	F	++
CMOTT93_0069	Otter Creek	NA	M	++
CMOTT93_0070	Otter Creek	NA	F	++
CMOTT93_0071	Otter Creek	NA	F	--
CMOTT93_0072	Otter Creek	NA	F	++
CMOTT93_0073	Otter Creek	NA	M	++
CMOTT93_0075	Otter Creek	NA	F	+-
CMOTT93_0077	Otter Creek	NA	F	+-
CMOTT93_0078	Otter Creek	NA	M	++
CMOTT93_0079	Otter Creek	NA	M	++
CMOTT93_0080	Otter Creek	NA	F	++
CMOTT93_0083	Otter Creek	NA	F	++
CMOTT93_0084	Otter Creek	NA	F	++
CMOTT93_0085	Otter Creek	NA	F	++
CMOTT93_0086	Otter Creek	NA	F	+-
CMOTT93_0087	Otter Creek	NA	M	++
CMOTT93_0088	Otter Creek	NA	F	++
CMOTT93_0089	Otter Creek	NA	F	++
CMOTT93_0090	Otter Creek	NA	M	++
CMOTT93_0091	Otter Creek	NA	M	++
CMOTT93_0093qc	Otter Creek	NA	M	++
CMOTT93_0094	Otter Creek	NA	F	++
CMANV92C_0001	Swift River	NA	F	++
CMANV92C_0002	Swift River	NA	M	+-
CMANV92C_0004	Swift River	NA	F	++
CMANV92C_0005	Swift River	NA	M	++
CMANV92C_0006	Swift River	NA	F	++
CMANV92C_0007	Swift River	NA	M	++
CMANV92C_0008	Swift River	NA	M	+-
CMANV92C_0009	Swift River	NA	M	++
CMANV92C_0010	Swift River	NA	M	++
CMANV92C_0011	Swift River	NA	F	++
CMANV92C_0012	Swift River	NA	F	++
CMANV92C_0013	Swift River	NA	F	++
CMANV92C_0014qc	Swift River	NA	F	+-
CMANV92C_0017	Swift River	NA	F	--
CMANV92C_0018	Swift River	NA	F	++
CMANV92C_0019	Swift River	NA	F	++
CMANV92C_0021	Swift River	NA	M	++
CMANV92C_0022	Swift River	NA	F	++
CMANV92C_0023	Swift River	NA	M	+-
CMANV92C_0024	Swift River	NA	M	++
CMANV92C_0025	Swift River	NA	M	++
CMANV92C_0026	Swift River	NA	F	++
CMANV92C_0027	Swift River	NA	M	++
CMANV92C_0028	Swift River	NA	M	++
CMANV92C_0029	Swift River	NA	M	+-
CMANV92C_0030	Swift River	NA	M	++
CMANV92C_0031	Swift River	NA	F	+-
CMANV92C_0032	Swift River	NA	M	++
CMANV92C_0034	Swift River	NA	M	++
CMANV92C_0035	Swift River	NA	M	++
CMANV92C_0036	Swift River	NA	F	+-
CMANV92C_0037	Swift River	NA	F	++
CMANV92C_0038	Swift River	NA	F	+-
CMANV92C_0039	Swift River	NA	M	++
CMANV92C_0040	Swift River	NA	F	+-
CMANV92C_0041	Swift River	NA	F	++
CMANV92C_0042	Swift River	NA	F	++
CMANV92C_0043	Swift River	NA	F	++
CMANV92C_0044	Swift River	NA	M	++
CMANV92C_0045	Swift River	NA	F	++
CMANV92C_0046	Swift River	NA	M	+-
CMANV92C_0047	Swift River	NA	F	++
CMANV92C_0048	Swift River	NA	F	+-
CMANV92C_0049	Swift River	NA	F	++
CMANV92C_0085qc	Swift River	NA	F	++
CMANV92C_0093qc	Swift River	NA	M	++
Phenotypic sex for each sample, along with genetic sex and inversion karyotype inferred from PCA.
